# Supplementary material for: Large-scale quantitative glycoproteomics analysis of site-specific glycosylation occupancy
Source: Royal Society of Chemistry journal article supplement (doi:10.1039/c2mb25268f), 2012-08-14
Supplement: c2mb25268f.pdf [file c2mb25268f.pdf]

## K.QLVHSFAEGQDQGSAYAN\*R.T

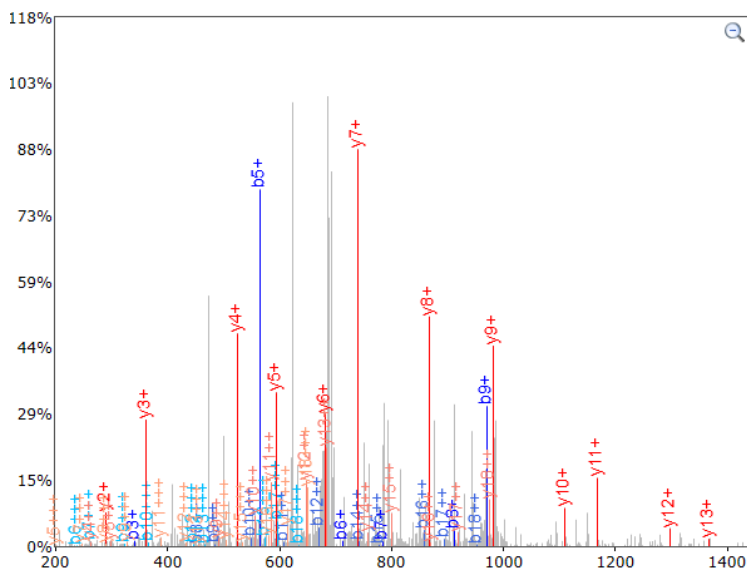

| b+        | b2+      | b3+      | #  | Seq | #  | y+        | y2+      | y3+      |
|-----------|----------|----------|----|-----|----|-----------|----------|----------|
| 129.0659  | 65.0366  | 43.6935  | 1  | Q   | 19 |           |          |          |
| 242.1499  | 121.5786 | 81.3882  | 2  | L   | 18 | 1950.8940 | 975.9507 | 650.9695 |
| 341.2183  | 171.1128 | 114.4110 | 3  | V   | 17 | 1837.8100 | 919.4086 | 613.2748 |
| 478.2772  | 239.6423 | 160.0973 | 4  | H   | 16 | 1738.7416 | 869.8744 | 580.2520 |
| 565.3093  | 283.1583 | 189.1079 | 5  | S   | 15 | 1601.6826 | 801.3450 | 534.5657 |
| 712.3777  | 356.6925 | 238.1307 | 6  | F   | 14 | 1514.6506 | 757.8289 | 505.5551 |
| 783.4148  | 392.2110 | 261.8098 | 7  | A   | 13 | 1367.5822 | 684.2947 | 456.5322 |
| 912.4574  | 456.7323 | 304.8240 | 8  | E   | 12 | 1296.5451 | 648.7762 | 432.8532 |
| 969.4789  | 485.2431 | 323.8311 | 9  | G   | 11 | 1167.5025 | 584.2549 | 389.8390 |
| 1097.5374 | 549.2724 | 366.5173 | 10 | Q   | 10 | 1110.4810 | 555.7442 | 370.8319 |
| 1212.5644 | 606.7858 | 404.8596 | 11 | D   | 9  | 982.4224  | 491.7149 | 328.1457 |
| 1340.6230 | 670.8151 | 447.5458 | 12 | Q   | 8  | 867.3955  | 434.2014 | 289.8034 |
| 1397.6444 | 699.3258 | 466.5530 | 13 | G   | 7  | 739.3369  | 370.1721 | 247.1172 |
| 1484.6764 | 742.8419 | 495.5637 | 14 | S   | 6  | 682.3155  | 341.6614 | 228.1100 |
| 1555.7136 | 778.3604 | 519.2427 | 15 | A   | 5  | 595.2834  | 298.1454 | 199.0993 |
| 1718.7769 | 859.8921 | 573.5971 | 16 | Y   | 4  | 524.2463  | 262.6268 | 175.4203 |
| 1789.8140 | 895.4106 | 597.2762 | 17 | A   | 3  | 361.1830  | 181.0951 | 121.0658 |
| 1904.8409 | 952.9241 | 635.6185 | 18 | N   | 2  | 290.1459  | 145.5766 | 97.3868  |
|           |          |          | 19 | R   | 1  | 175.1190  | 88.0631  | 59.0445  |

[Click] to move table

Static Modifications:

## R.YLPVN\*SSLTDCSER.C

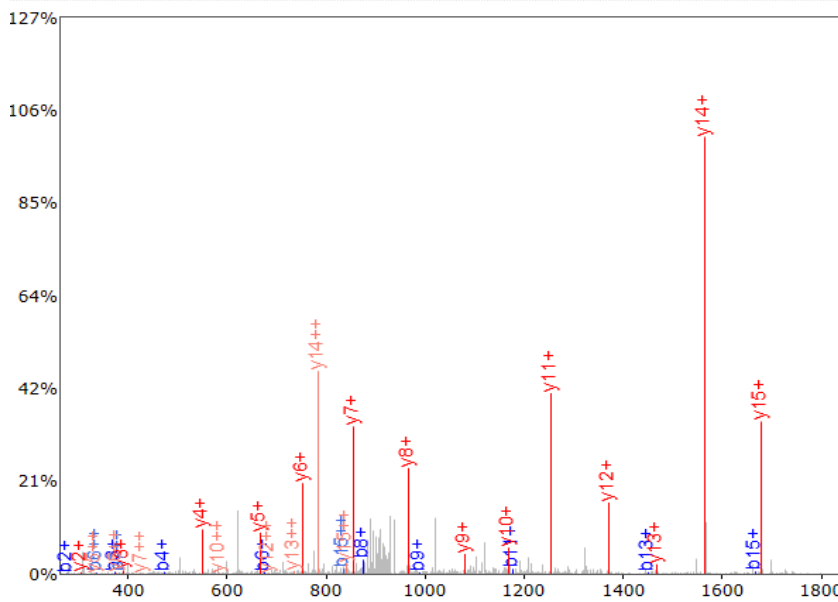

| b+        | b2+      | #  | Seq | #  | y+        | y2+      |
|-----------|----------|----|-----|----|-----------|----------|
| 164.0706  | 82.5389  | 1  | Y   | 16 |           |          |
| 277.1547  | 139.0810 | 2  | L   | 15 | 1678.7953 | 839.9013 |
| 374.2074  | 187.6074 | 3  | P   | 14 | 1565.7112 | 783.3592 |
| 473.2758  | 237.1416 | 4  | V   | 13 | 1468.6584 | 734.8329 |
| 588.3028  | 294.6550 | 5  | N   | 12 | 1369.5900 | 685.2986 |
| 675.3348  | 338.1710 | 6  | S   | 11 | 1254.5631 | 627.7852 |
| 762.3668  | 381.6871 | 7  | S   | 10 | 1167.5311 | 584.2692 |
| 875.4509  | 438.2291 | 8  | L   | 9  | 1080.4990 | 540.7532 |
| 988.5350  | 494.7711 | 9  | L   | 8  | 967.4150  | 484.2111 |
| 1089.5826 | 545.2950 | 10 | T   | 7  | 854.3309  | 427.6691 |
| 1176.6147 | 588.8110 | 11 | S   | 6  | 753.2832  | 377.1453 |
| 1291.6416 | 646.3244 | 12 | D   | 5  | 666.2512  | 333.6292 |
| 1451.6723 | 726.3398 | 13 | C   | 4  | 551.2243  | 276.1158 |
| 1538.7043 | 769.8558 | 14 | S   | 3  | 391.1936  | 196.1004 |
| 1667.7469 | 834.3771 | 15 | E   | 2  | 304.1615  | 152.5844 |
|           |          | 16 | R   | 1  | 175.1190  | 88.0631  |

[Click] to move table

Static Modifications:

C: 57.0215

K: 28.029

R.DPN\*CSSILQTEER.N

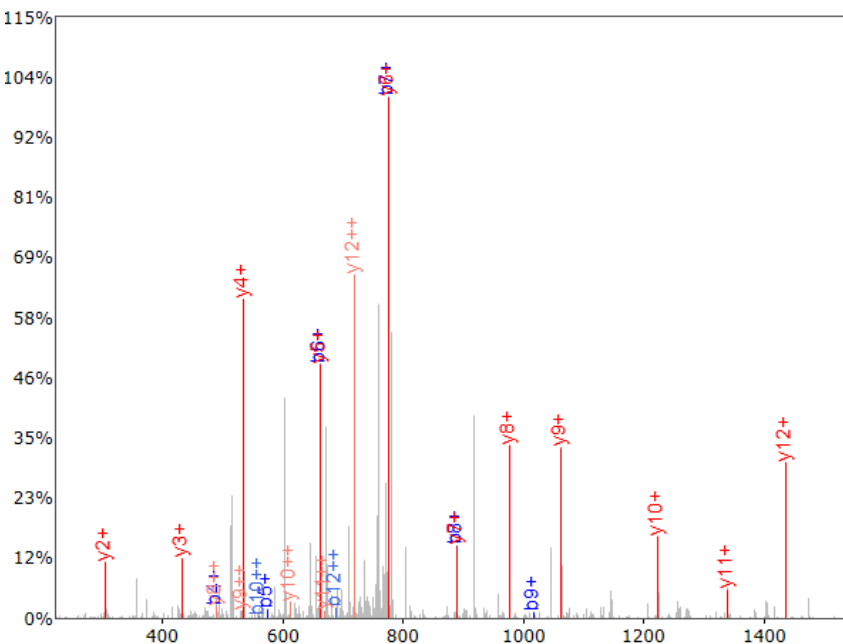

| b+        | b2+      | #  | Seq | #  | y+        | y2+      |
|-----------|----------|----|-----|----|-----------|----------|
| 116.0342  | 58.5207  | 1  | D   | 13 |           |          |
| 213.0870  | 107.0471 | 2  | P   | 12 | 1434.6530 | 717.8301 |
| 328.1139  | 164.5606 | 3  | N   | 11 | 1337.6002 | 669.3037 |
| 488.1446  | 244.5759 | 4  | C   | 10 | 1222.5733 | 611.7903 |
| 575.1766  | 288.0919 | 5  | S   | 9  | 1062.5426 | 531.7749 |
| 662.2087  | 331.6080 | 6  | S   | 8  | 975.5106  | 488.2589 |
| 775.2927  | 388.1500 | 7  | I   | 7  | 888.4785  | 444.7429 |
| 888.3768  | 444.6920 | 8  | L   | 6  | 775.3945  | 388.2009 |
| 1016.4354 | 508.7213 | 9  | Q   | 5  | 662.3104  | 331.6588 |
| 1117.4830 | 559.2452 | 10 | T   | 4  | 534.2518  | 267.6295 |
| 1246.5256 | 623.7665 | 11 | E   | 3  | 433.2041  | 217.1057 |
| 1375.5682 | 688.2877 | 12 | E   | 2  | 304.1615  | 152.5844 |
|           |          | 13 | R   | 1  | 175.1190  | 88.0631  |

[\[Click\]](#) to move table  
 Static Modifications:  
**C: 57.0215**  
**K: 28.029**  
 Variable Modifications:  
**N: 0.984**

R.QDLN\*SSDVHSLQPQLDCGPR.E

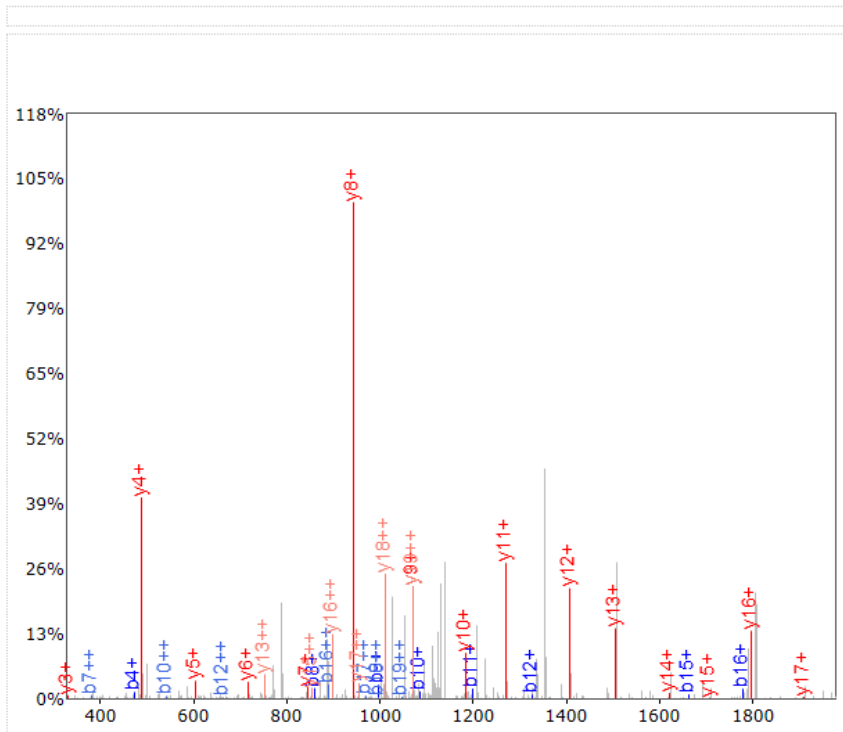

| b+        | b2+       | #  | Seq | #  | y+        | y2+       |
|-----------|-----------|----|-----|----|-----------|-----------|
| 129.0659  | 65.0366   | 1  | Q   | 20 |           |           |
| 244.0928  | 122.5500  | 2  | D   | 19 | 2138.9771 | 1069.9922 |
| 357.1769  | 179.0921  | 3  | L   | 18 | 2023.9502 | 1012.4787 |
| 472.2038  | 236.6055  | 4  | N   | 17 | 1910.8661 | 955.9367  |
| 559.2358  | 280.1215  | 5  | S   | 16 | 1795.8392 | 898.4232  |
| 646.2678  | 323.6376  | 6  | S   | 15 | 1708.8072 | 854.9072  |
| 761.2948  | 381.1510  | 7  | D   | 14 | 1621.7752 | 811.3912  |
| 860.3632  | 430.6852  | 8  | V   | 13 | 1506.7482 | 753.8777  |
| 997.4221  | 499.2147  | 9  | H   | 12 | 1407.6798 | 704.3435  |
| 1084.4541 | 542.7307  | 10 | S   | 11 | 1270.6209 | 635.8141  |
| 1197.5382 | 599.2727  | 11 | L   | 10 | 1183.5889 | 592.2981  |
| 1325.5968 | 663.3020  | 12 | Q   | 9  | 1070.5048 | 535.7560  |
| 1422.6495 | 711.8284  | 13 | P   | 8  | 942.4462  | 471.7267  |
| 1550.7081 | 775.8577  | 14 | Q   | 7  | 845.3934  | 423.2004  |
| 1663.7922 | 832.3997  | 15 | L   | 6  | 717.3349  | 359.1711  |
| 1778.8191 | 889.9132  | 16 | D   | 5  | 604.2508  | 302.6290  |
| 1938.8498 | 969.9285  | 17 | C   | 4  | 489.2239  | 245.1156  |
| 1995.8713 | 998.4393  | 18 | G   | 3  | 329.1932  | 165.1002  |
| 2092.9240 | 1046.9657 | 19 | P   | 2  | 272.1717  | 136.5895  |
|           |           | 20 | R   | 1  | 175.1190  | 88.0631   |

[\[Click\]](#) to move table  
 Static Modifications:

### K.TSN\*SSQVSNEQDK.I

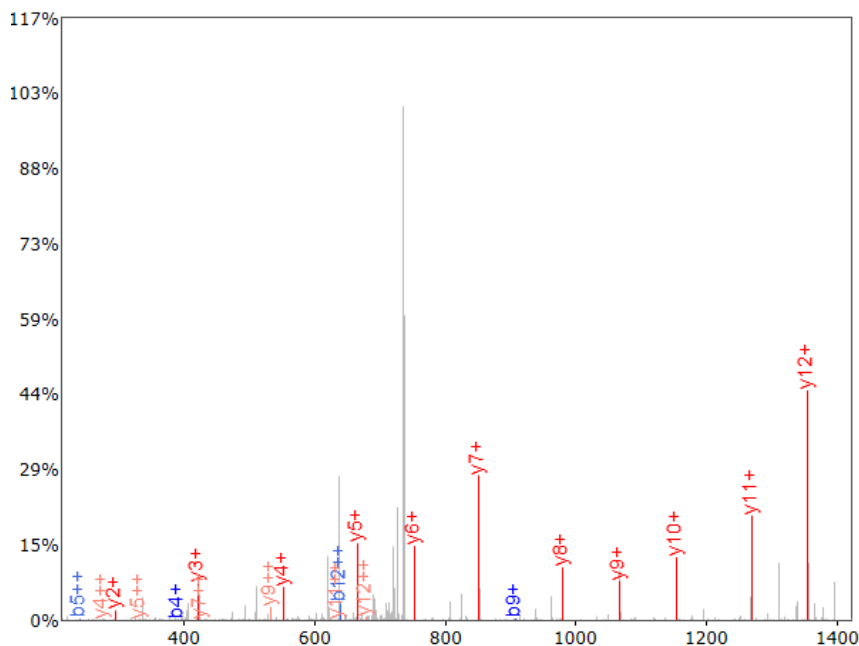

| b+        | b2+      | #  | Seq | #  | y+        | y2+      |
|-----------|----------|----|-----|----|-----------|----------|
| 102.0550  | 51.5311  | 1  | T   | 13 |           |          |
| 189.0870  | 95.0471  | 2  | S   | 12 | 1355.6219 | 678.3146 |
| 304.1139  | 152.5606 | 3  | N   | 11 | 1268.5898 | 634.7986 |
| 391.1459  | 196.0766 | 4  | S   | 10 | 1153.5629 | 577.2851 |
| 478.1780  | 239.5926 | 5  | S   | 9  | 1066.5309 | 533.7691 |
| 606.2365  | 303.6219 | 6  | Q   | 8  | 979.4989  | 490.2531 |
| 705.3050  | 353.1561 | 7  | V   | 7  | 851.4403  | 426.2238 |
| 792.3370  | 396.6721 | 8  | S   | 6  | 752.3719  | 376.6896 |
| 906.3799  | 453.6936 | 9  | N   | 5  | 665.3398  | 333.1736 |
| 1035.4225 | 518.2149 | 10 | E   | 4  | 551.2969  | 276.1521 |
| 1163.4811 | 582.2442 | 11 | Q   | 3  | 422.2543  | 211.6308 |
| 1278.5080 | 639.7577 | 12 | D   | 2  | 294.1957  | 147.6015 |
|           |          | 13 | K   | 1  | 179.1688  | 90.0880  |

[\[Click\]](#) to move table

Static Modifications:

C: 57.0215

K: 28.029

Variable Modifications:

N: 0.984

K: 4.027

### R.AQPGTM"SN\*GTETR.G

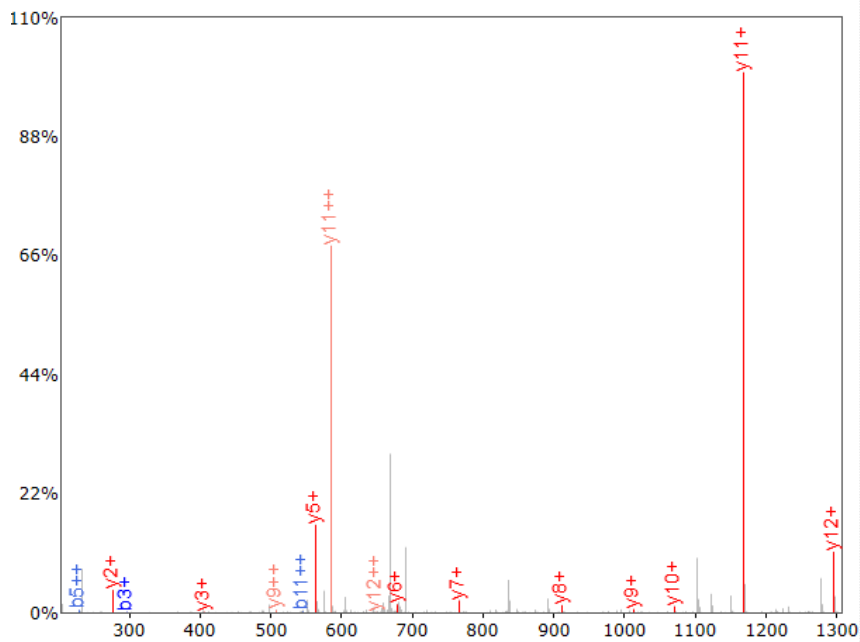

| b+        | b2+      | #  | Seq | #  | y+        | y2+      |
|-----------|----------|----|-----|----|-----------|----------|
| 72.0444   | 36.5258  | 1  | A   | 13 |           |          |
| 200.1030  | 100.5551 | 2  | Q   | 12 | 1295.5532 | 648.2802 |
| 297.1557  | 149.0815 | 3  | P   | 11 | 1167.4946 | 584.2509 |
| 354.1772  | 177.5922 | 4  | G   | 10 | 1070.4418 | 535.7246 |
| 455.2249  | 228.1161 | 5  | T   | 9  | 1013.4204 | 507.2138 |
| 602.2603  | 301.6338 | 6  | M   | 8  | 912.3727  | 456.6900 |
| 689.2923  | 345.1498 | 7  | S   | 7  | 765.3373  | 383.1723 |
| 804.3192  | 402.6632 | 8  | N   | 6  | 678.3053  | 339.6563 |
| 861.3407  | 431.1740 | 9  | G   | 5  | 563.2784  | 282.1428 |
| 962.3884  | 481.6978 | 10 | T   | 4  | 506.2569  | 253.6321 |
| 1091.4309 | 546.2191 | 11 | E   | 3  | 405.2092  | 203.1082 |
| 1192.4786 | 596.7430 | 12 | T   | 2  | 276.1666  | 138.5870 |
|           |          | 13 | R   | 1  | 175.1190  | 88.0631  |

[\[Click\]](#) to move table

Static Modifications:

C: 57.0215

K: 28.029

Variable Modifications:

M: 15.9949

N: 0.984
