# Supplementary material for: Large-scale quantitative glycoproteomics analysis of site-specific glycosylation occupancy
Source: Royal Society of Chemistry journal article supplement (doi:10.1039/c2mb25268f), 2012-08-14
Supplement: c2mb25268f_2.pdf [file c2mb25268f_2.pdf]

**Supplemental table 1. Potential N-linked glycosylation sites identified in human pancreas tissue. (\* indicates the potential N-linked glycosylation motifs, " indicates oxidized methionine)**

| Peptides                  | PepProphet Prob. | Mass deviation (ppm) | Starting SeqPos | N-linked SeqPos | Uniprot ID | Protein description                                          | Gene Name | Known glycosylation sites - annotated by <a href="http://www.uniprot.org">www.uniprot.org</a> |
|---------------------------|------------------|----------------------|-----------------|-----------------|------------|--------------------------------------------------------------|-----------|-----------------------------------------------------------------------------------------------|
| K.QLVHSFAEGQDQGSAYAN*R.T  | 1.00             | -2.41                | 74              | 91              | Q5ZPR3     | Costimulatory molecule                                       | CD276     | N-linked: 104, 189, 215, 322, 407, 433                                                        |
| R.YLPVN*SSLLTSDCSER.C     | 0.99             | -2.15                | 5182            | 5186            | Q9Y6R7     | IgGFc-binding protein                                        | FCGBP     | N-linked: 75, 91, 1743, 2138, 2518, 3719, 4145,                                               |
| R.DPN*CSSILQTEER.N        | 1.00             | +3.16                | 258             | 260             | P55259     | Pancreatic secretory granule membrane major glycoprotein GP2 | GP2       | N-linked: 65, 122, 362                                                                        |
| R.QDLN*SSDVHSLQPQLDCGPR.E | 0.99             | +0.14                | 213             | 216             | P55259     | Pancreatic secretory granule membrane major glycoprotein GP2 | GP2       | N-linked: 65, 122, 363                                                                        |
| K.TSN*SSQVSNEQDK.I        | 0.99             | +4.01                | 248             | 250             | Q5JRA6     | Melanoma inhibitory activity protein 3 precursor             | MIA3      | N-linked: 246, 589                                                                            |
| R.AQPGTM"SN*GTETR.G       | 1.00             | -2.54                | 487             | 494             | Q9UGT4     | Sushi domain-containing protein 2 precursor                  | SUSD2     | N-linked: 162, 177, 522                                                                       |
